# Supplementary material for: One-step pyrolysis synthesis of ternary (P,S,N)-doped graphene as an efficient metal-free electrocatalyst for the oxygen reduction reaction
Source: Royal Society of Chemistry journal article supplement (doi:10.1039/d2dt04124c), 2023-01-01
Supplement: d2dt04124c1.pdf [file d2dt04124c1.pdf]

## Supplementary information

### **One-step pyrolysis synthesis of ternary (P, S, N)-doped graphene as an efficient metal-free electrocatalyst for oxygen reduction reaction**

Yujun Wu,<sup>a,b</sup> Wei Shuang,<sup>a</sup> Lin Yang<sup>a</sup> and Chuanbao Cao<sup>\*b</sup>

<sup>a</sup> Collaborative Innovation Center of Henan Province for Green Manufacturing of Fine Chemicals, Key Laboratory of Green Chemical Media and Reactions, Ministry of Education, School of Chemistry and Chemical Engineering, Henan Normal University, Xinxiang, Henan 453007, P. R. China

<sup>b</sup> Research Center of Materials Science and Beijing Key Laboratory of Construction Tailorable Advanced Functional Materials and Green Applications, Beijing Institute of Technology, Beijing 100081, P. R. China

\* Corresponding author (email: cbcao@bit.edu.cn)

### **The MB absorption technique**

Firstly, the ethanol solution (150 mL) which includes a known mass of sample PSN-G3 (4 mg) and excessive amount of MB (10 mg) was handled by sonication adequately. Later, the ethanol solvent was evaporated in the vacuum oven. Subsequently, the free MB was dissolved in a specific amount of water (1000 mL) and determined by a UV-visible spectrophotometer at  $\lambda = 664$  nm based on the standard concentrations of MB. Herein, the standard curve of MB based on Table S1 is indicated in the equation 1 in supplementary information. Consequently, the specific surface area of the sample PSN-G3 was calculated according to the mass and specific surface area literature value ( $2540 \text{ m}^2 \text{ g}^{-1}$ ) of adsorbed MB. In this work, the value of A is 0.8071 for PSN-G3, thus the specific surface area value of PSN-G3 is  $1868 \text{ m}^2 \text{ g}^{-1}$ .

The standard curve of MB based on Table S1 is as follows:

$$A=0.1148c-0.0032 (R^2=0.9992) \quad (1)$$

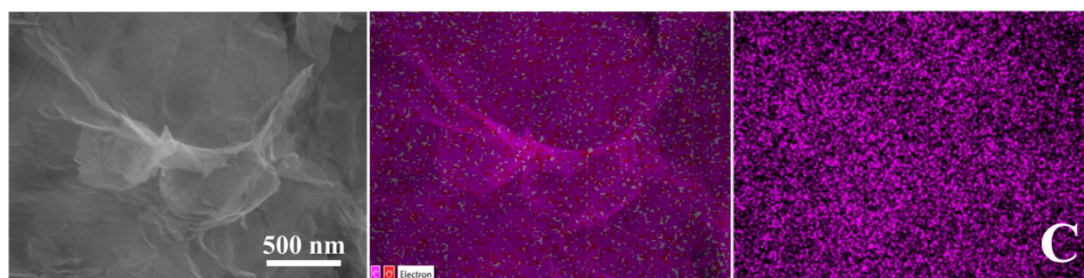

**Fig. S1** FESEM images and corresponding EDS mapping images of G.

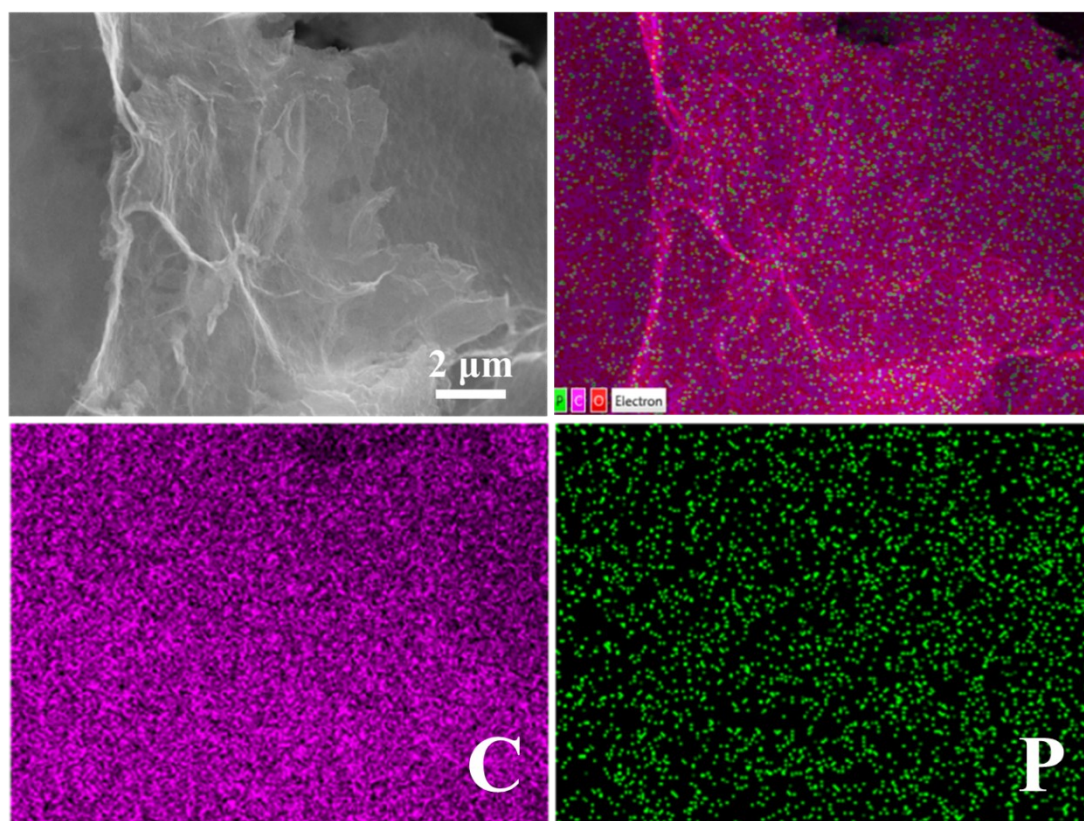

**Fig. S2** FESEM images and corresponding EDS mapping images of P-G.

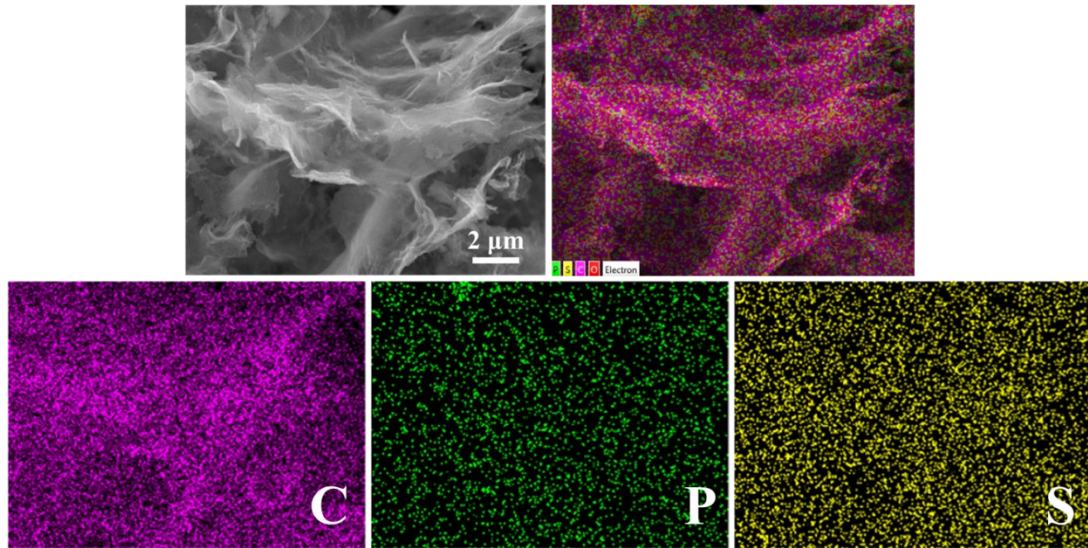

**Fig. S3** FESEM images and corresponding EDS mapping images of PS-G.

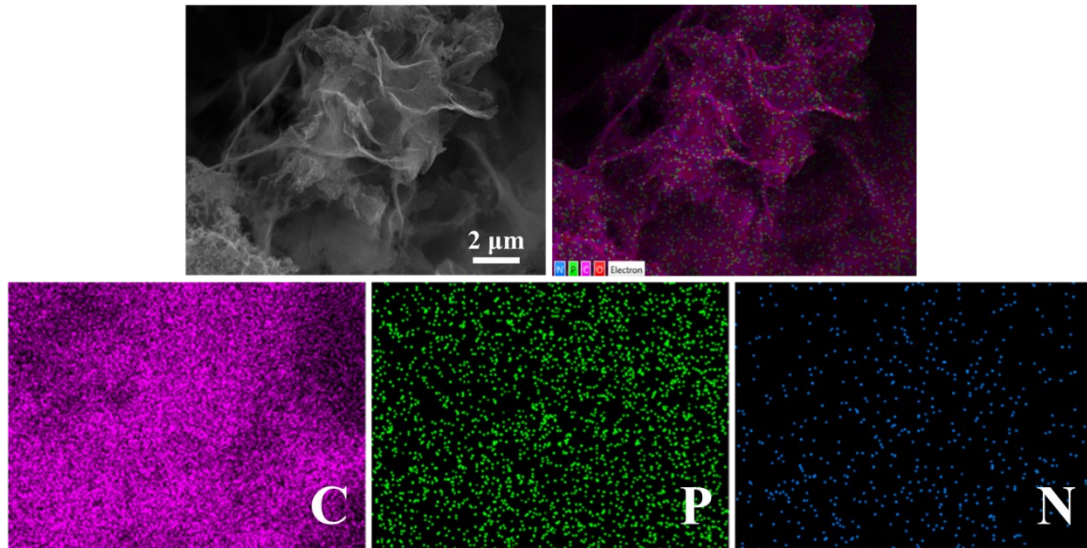

**Fig. S4** FESEM images and corresponding EDS mapping images of PN-G.



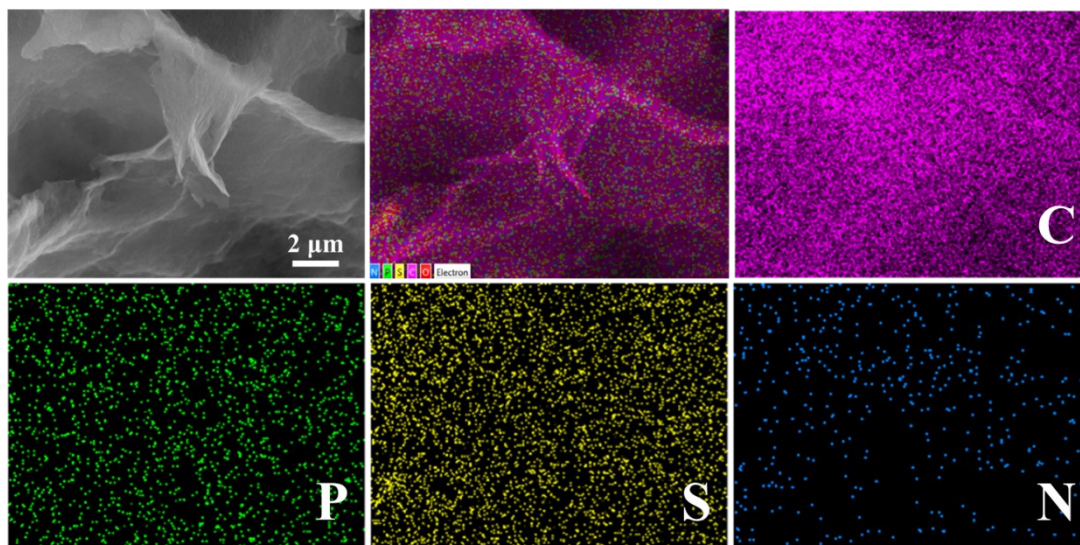

**Fig. S5** FESEM images and corresponding EDS mapping images of PSN-G1.

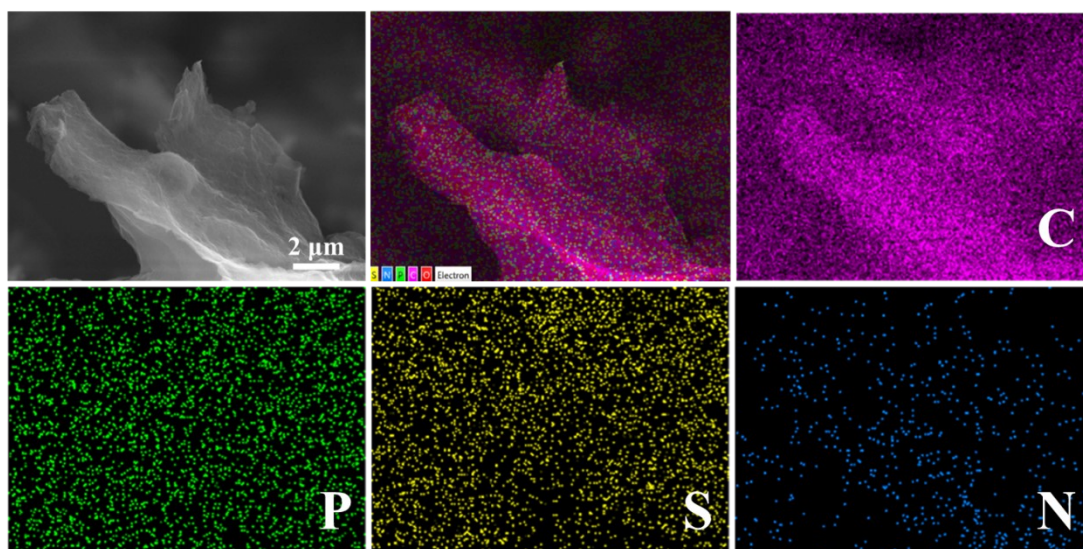

**Fig. S6** FESEM images and corresponding EDS mapping images of PSN-G2.



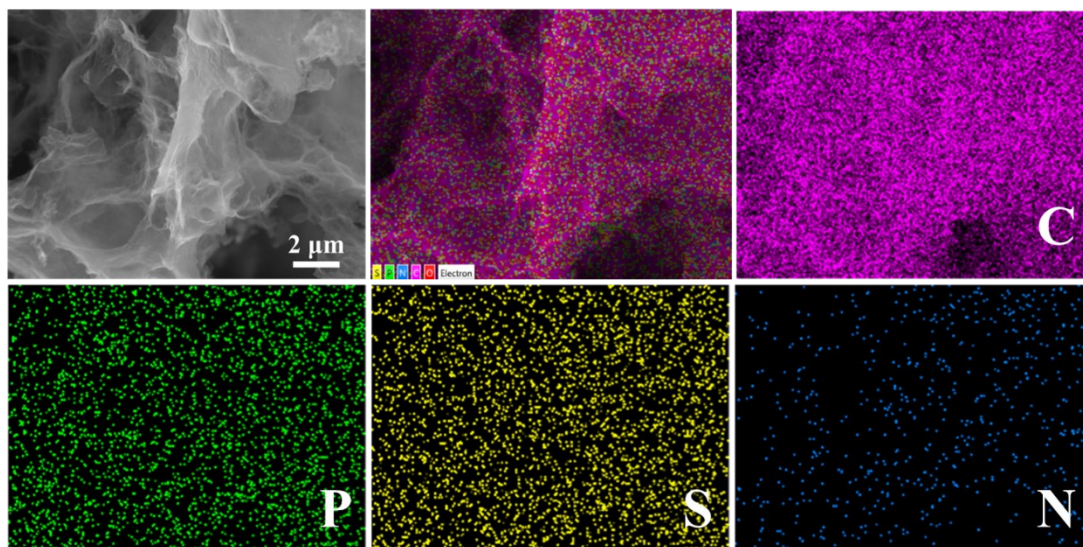

**Fig. S7** FESEM images and corresponding EDS mapping images of PSN-G4.

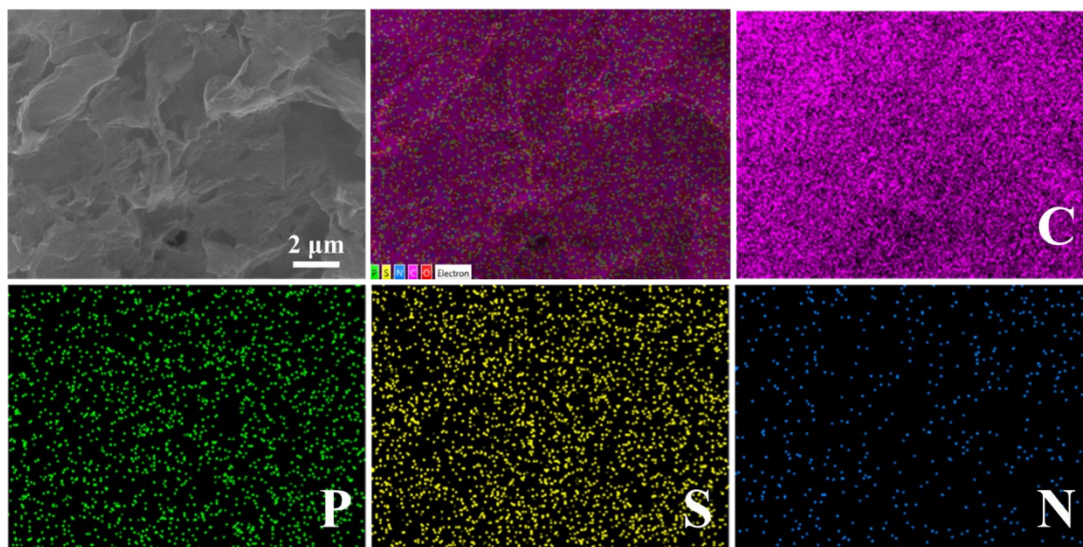

**Fig. S8** FESEM images and corresponding EDS mapping images of PSN-G5.

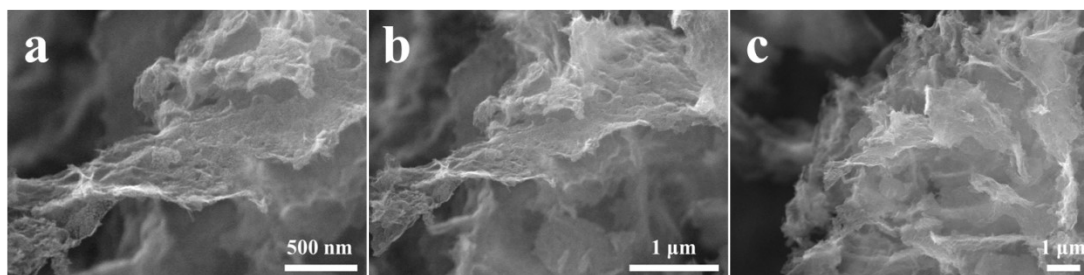

**Fig. S9** FESEM images of PSN-G3-1000-10 at different magnifications.

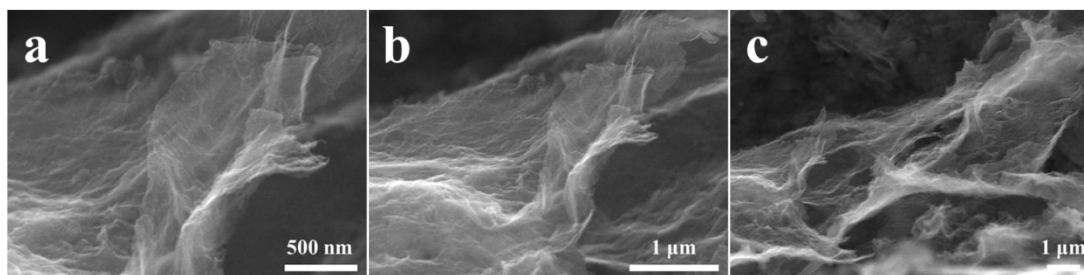

**Fig. S10** FESEM images of PSN-G3-900-10 at different magnifications.

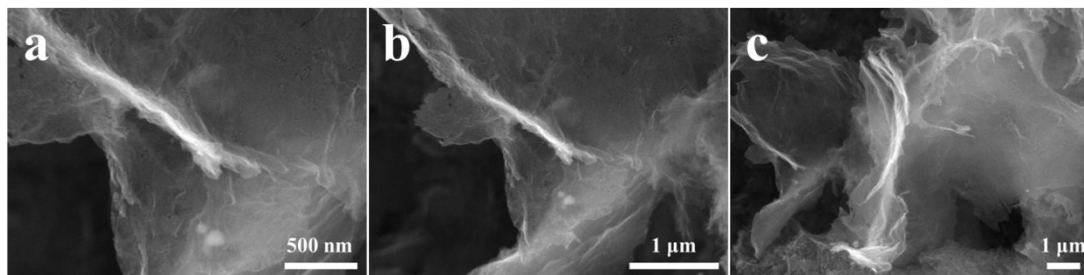

**Fig. S11** FESEM images of PSN-G3-950-30 at different magnifications.



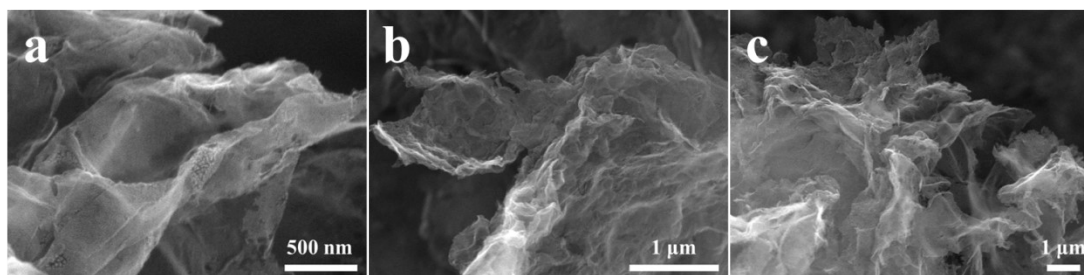

**Fig. S12** FESEM images of PSN-G3-950-60 at different magnifications.

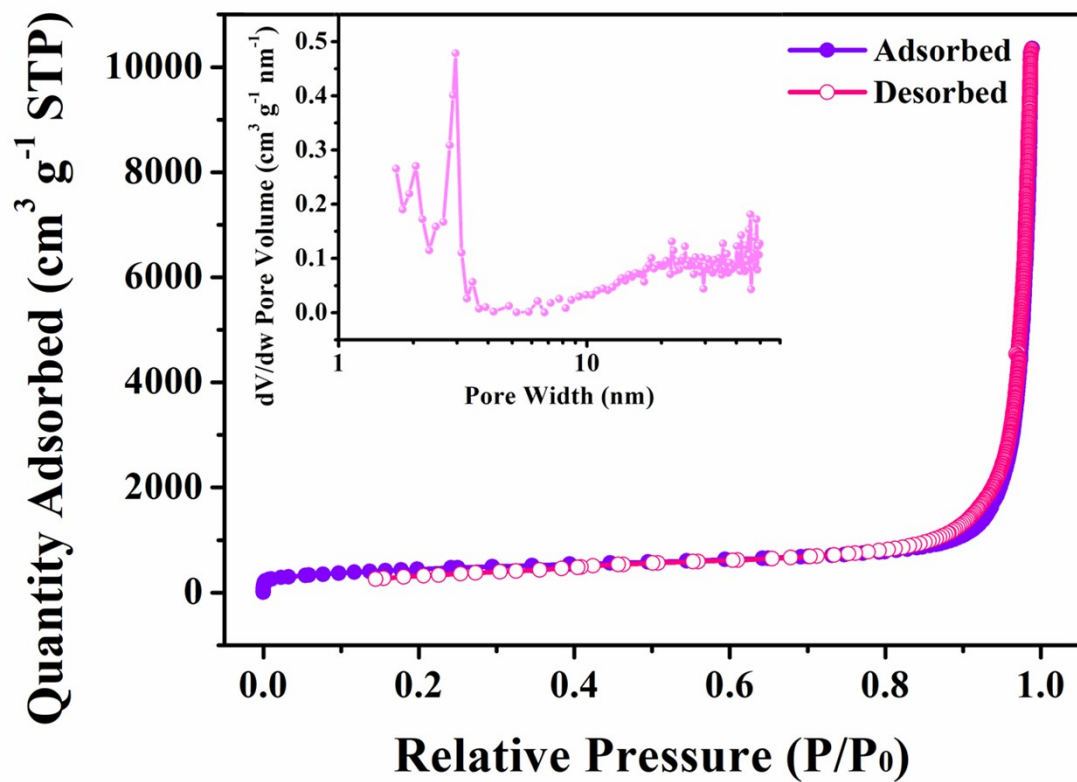

Fig. S13  $\text{N}_2$  adsorption–desorption isotherms and an inset showing the corresponding pore size distributional details of PSN-G3.

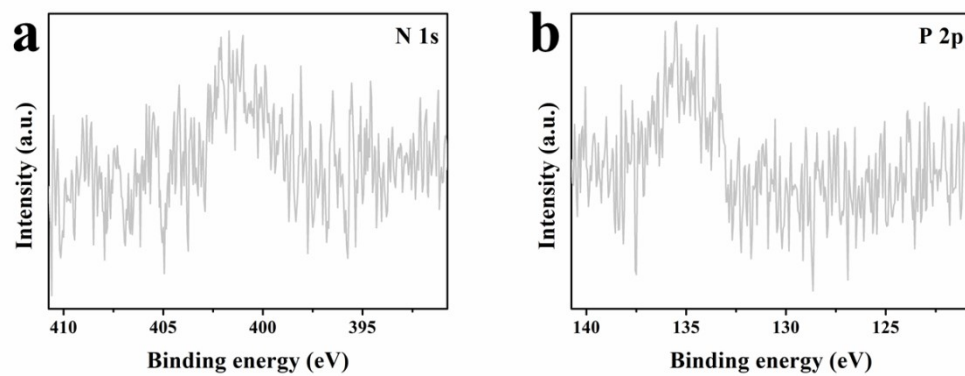

**Fig. S14** High-resolution XPS spectra for (a) N 1s and (b) P 2p of PSN-G3.

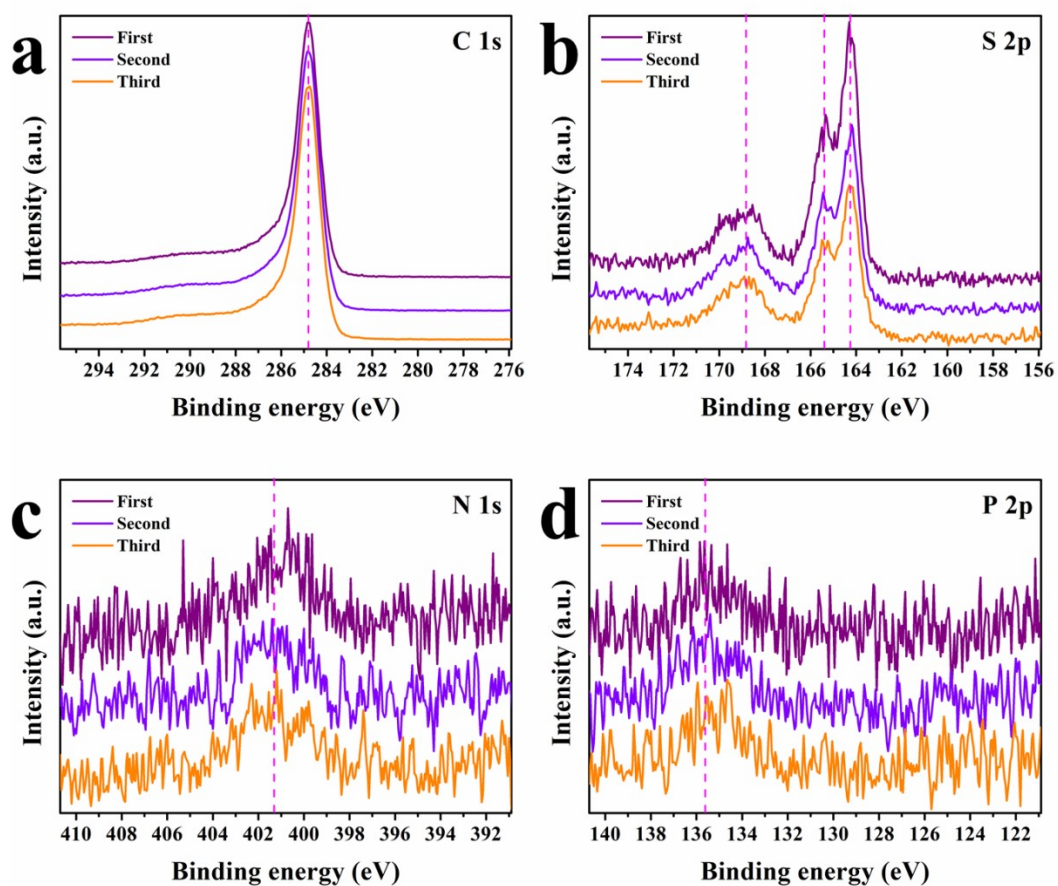

**Fig. S15** The high-resolution XPS spectra for (a) C 1s, (b) S 2p, (c) N 1s and (d) P 2p of PSN-G3

for three parallel tests.

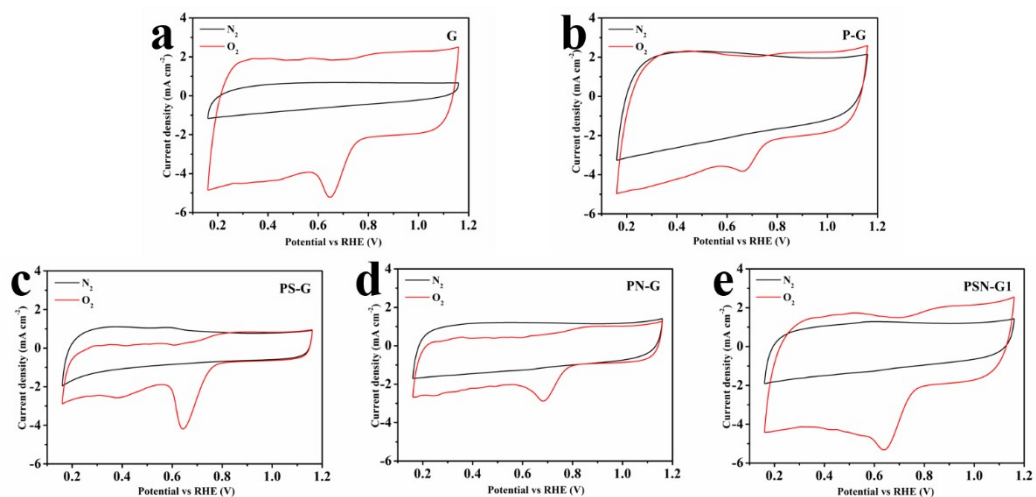

**Fig. S16** Comparison of CV curves in the N<sub>2</sub>-saturated and O<sub>2</sub>-saturated 0.1 mol L<sup>-1</sup> KOH electrolyte of G, P-G, PS-G, PN-G and PSN-G1.



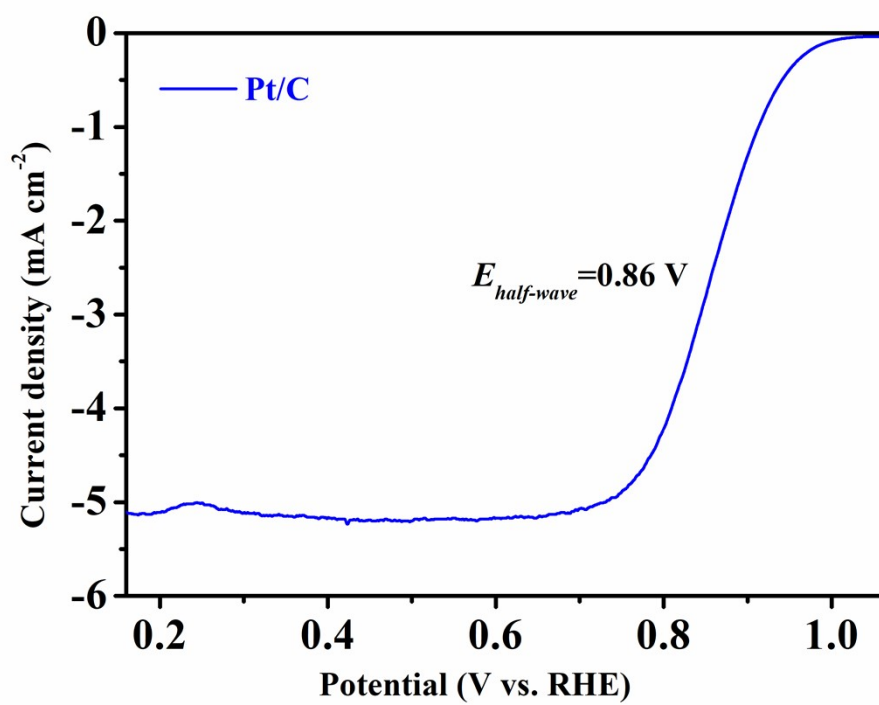

**Fig. S17** Comparison of CV curves in the N<sub>2</sub>-saturated and O<sub>2</sub>-saturated 0.1 mol L<sup>-1</sup> KOH electrolyte of G, P-G, PS-G, PN-G and PSN-G1.

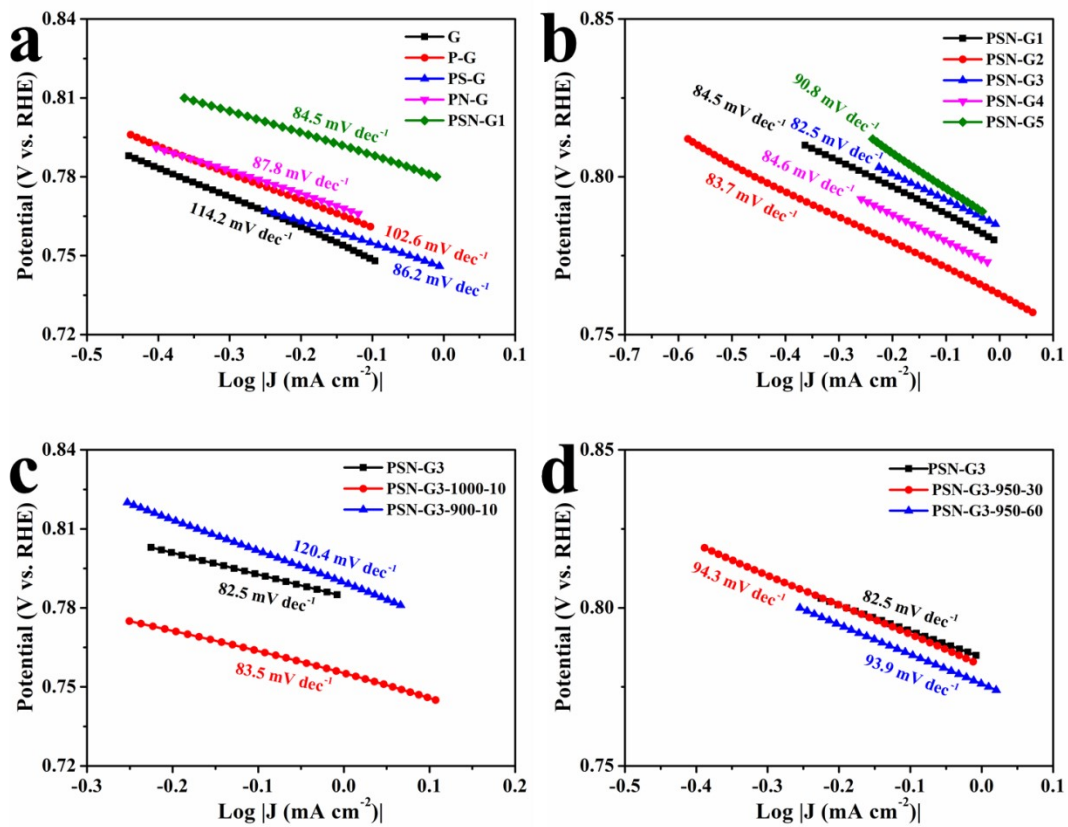

**Fig. S18** Comparison of Tafel plots of (a) G, P-G, PS-G, PN-G and PSN-G1; (b) PSN-G1, PSN-G2, PSN-G3, PSN-G4 and PSN-G5; (c) PSN-G3, PSN-G3-1000-10 and PSN-G3-900-10; (d) PSN-G3, PSN-G3-950-30 and PSN-G3-950-60.

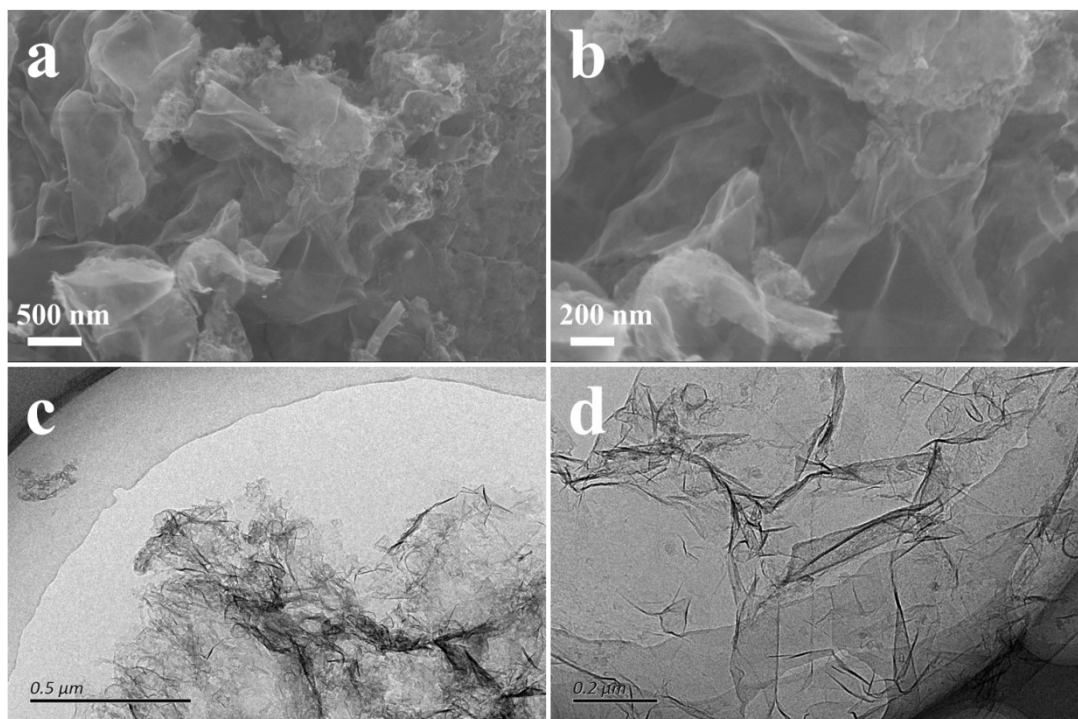

**Fig. S19** (a-b) FESEM images of PSN-G3 after i-t test at different magnifications; (c-d) TEM images of PSN-G3 after i-t test at different magnifications.

**Table S1** The standard curve values of MB by UV-visible spectrophotometer analysis

| <b>c (mg L<sup>-1</sup>)</b> | <b>0</b> | <b>0.5</b>    | <b>1</b>      | <b>2</b>      | <b>5</b>      | <b>10</b>     |
|------------------------------|----------|---------------|---------------|---------------|---------------|---------------|
| <b>A</b>                     | <b>0</b> | <b>0.0535</b> | <b>0.1066</b> | <b>0.2145</b> | <b>0.5943</b> | <b>1.1364</b> |

**Table S2** The concentration of chemical elements for PSN-G3 by XPS analysis

| <b>Chemical Elements</b>   | <b>C</b>     | <b>O</b>    | <b>S</b>    | <b>N</b>    | <b>P</b>    |
|----------------------------|--------------|-------------|-------------|-------------|-------------|
| <b>Concentration (at%)</b> | <b>94.12</b> | <b>5.00</b> | <b>0.52</b> | <b>0.28</b> | <b>0.08</b> |
